# Supplementary material for: Nutrient estimation from an FFQ developed for a black Zimbabwean population
Source: PubMed Central journal article supplement (PMC1325035; doi:10.1186/1475-2891-4-37), 2005-12-13
Supplement: 1475-2891-4-37-S1.pdf [file 1475-2891-4-37-S1.pdf]

# **PURE/Zimbabwe**

---

We are very grateful to you for your participation in this study. All information given by you will be held in strict confidence, and will be used for the purpose of this study only after removing any personal identifying information.

## **Adult Semi-Quantitative Food Frequency Questionnaire**

### **INSTRUCTIONS**

Please answer EACH question by marking  
an X in ONE BOX on each line:  
(unless otherwise instructed)

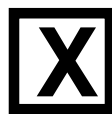

OR

By writing number(s) in the spaces provided:

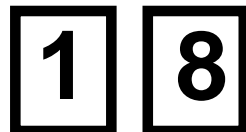

OR

By specifying the answer on the line(s) provided

















Centre #

  

Community#

  

Household #

 

Subject #

Subject Initials

< 1 year

1-3 years

4-6 years

> 6 years

mostly

occasionally

mostly

occasionally

mostly

occasionally

mostly

occasionally

99. Vitamin E









100. Vitamin B complex









101. Vitamin C









102. Calcium









103. Iron









104. Zinc









105. Multivitamin /Mineral supplement









106. What type of fat/oil do you use most often for cooking?

Vegetable oil

Canola /rape seed oil

Ghee

Lard

107. Name of Interviewer:  
(please print)

\_\_\_\_\_

Last Name

\_\_\_\_\_

First Initial

Interviewer Code:
